# Supplementary material for: Precocious puberty in male wild boars: a possible explanation for the dramatic population increase in Germany and Europe
Source: PeerJ. 2021 Jul 20;9:e11798. doi: 10.7717/peerj.11798 (PMC8300498; doi:10.7717/peerj.11798)
Supplement: Supplemental Information 1 — All collected samples and their information about collection date/location as well as age and weight data and a description of the histological observations performed on microscope for classification of the developmental stage/maturation for every animal. This data were used for statistical analysis. [file peerj-09-11798-s001.xlsx]

## Sheet: Raw data
ID	Sample No	Sample location	Sampling date	Weight	Age	Class	Puberty class	Observations
1	A 35	FA Wolfenbüttel	2011-11-15	19.5	8	1	prepubertal	Pre-spermatogonia; gonocytes; many LC
2	A 31	FA Wolfenbüttel	2011-11-15	20	8	1	prepubertal	Pre-spermatogonia; gonocytes; few amount of LC
3	A 34	FA Wolfenbüttel	2011-11-15	34	11	2	pubertal	spermatogonia until round spermatids; many spermatocytes; few amount of LC
4	A 33	FA Wolfenbüttel	2011-11-15	26	23	3	adult	qualitative and quantitative normal spermatogenesis
5	A 32	FA Wolfenbüttel	2011-11-15	35	20	3	adult	qualitative and quantitative normal spermatogenesis
6	A 64	FA Unterlüß	2011-11-22	19	8	1	prepubertal	Pre-spermatogonia, gonocytes; high amount of LC; Sertoli cells
7	A 65	FA Unterlüß	2011-11-22	18	8	1	prepubertal	Pre-spermatogonia; gonocytes; few amount of LC
8	A 66	FA Unterlüß	2011-11-22	21	8	1	prepubertal	Pre-spermatogonia; gonocytes
9	A 63	FA Unterlüß	2011-11-22	19	10	1	prepubertal	Pre-spermatogonia; gonocytes; few amount of LC
10	A 67	FA Unterlüß	2011-11-22	24	10	1	prepubertal	Pre-spermatogonia, gonocytes; hohe amount of LC
11	A	FA Unterlüß	2011-12-07	67	34	3	adult	qualitative and quantitative normal spermatogenesis
12	B	FA Unterlüß	2011-12-07	41	18	3	adult	qualitative and quantitative normal spermatogenesis
13	C	FA Unterlüß	2011-12-07	50	34	3	adult	qualitative and quantitative normal spermatogenesis
14	D	FA Unterlüß	2011-12-07	20.5	8.5	1	prepubertal	Prae-spermatogonia, gonocytes
15	A 111	FA Unterlüß	2011-12-10	32	8.5	2	pubertal	tubules with spermatocytes, tubules with gonocytes, Apoptosis, Tubulus Lumen in some tubules visible
16	A 113	FA Unterlüß	2011-12-10	24	8	1	prepubertal	Pre-spermatogonia, gonocytes im tubules lumen
17	A 114	FA Unterlüß	2011-12-10	30	8.5	3	adult	qualitative normal spermatogenesis, less quantitative, tubules with spermatocytes, round and elongated spermatids
18	A 112	FA Unterlüß	2011-12-10	21	10	3	adult	a - spermatogenesis until round spermatids, any spermatozoa; b - tubules with elongated spermatids/spermatozoa
19	A 156	FA Unterlüß	2012-01-02	34	8	3	adult	qualitative and quantitative normal spermatogenesis
20	A 192	FA Unterlüß	2012-01-07	35	11	3	adult	qualitative and quantitative normal spermatogenesis
21	A 194	FA Unterlüß	2012-01-07	26	10	3	adult	qualitative normal spermatogenesis, less quantitative (some tubules only until round spermatids)
22	A 170	FA Unterlüß	2012-01-07	26.5	10	2	pubertal	tubules with spermatocytes; few round spermatids
23	A 193	FA Unterlüß	2012-01-07	24	10	2	pubertal	tubules with spermatocytes, presence of tubules lumen
24	A 195	FA Unterlüß	2012-01-07	38	10	3	adult	qualitative and quantitative normal spermatogenesis
25	A 223	FoVw Schulenburg	2012-01-09	40	10	3	adult	qualitative and quantitative normal spermatogenesis
26	A 224	FoVw Schulenburg	2012-01-09	28	8.5	1	prepubertal	Pre-spermatogonia, gonocytes; very few tubules with spermatocytes and lumen (entry in puberty)
27	A 225	FoVw Schulenburg	2012-01-09	25	8	2	pubertal	tubules with spermatocytes, single gonocytes
28	A 226	FoVw Schulenburg	2012-01-09	41	11	3	adult	qualitative and quantitative normal spermatogenesis
29	A 222	FoVw Schulenburg	2012-01-09	69	22	3	adult	qualitative and quantitative normal spermatogenesis
30	A 116	FA Unterlüß	2012-01-09	31	8.5	1	prepubertal	Pre-spermatogonia, gonocytes
31	A 118	FA Unterlüß	2012-01-09	52	18	3	adult	qualitative and quantitative normal spermatogenesis
32	A 117	FA Unterlüß	2012-01-09	31	8	1	prepubertal	Pre-spermatogonia; gonocytes; few amount of LC
33	K 1	Steden	2012-06-21	90	34	3	adult	qualitative and quantitative normal spermatogenesis
34	K 2	Deinstedt	2012-09-30	57	26	3	adult	qualitative and quantitative normal spermatogenesis
35	K 3	Fehrenbruch	2012-10-26	82	16	3	adult	qualitative and quantitative normal spermatogenesis
36	K 104	FA Unterlüß	2012-11-06	44	18	3	adult	qualitative and quantitative normal spermatogenesis
37	k 105/A 24	FA Unterlüß	2012-11-06	NA	8.5	3	adult	qualitative and quantitative normal spermatogenesis (elongated spermatids and spermatozoa)
38	K 106	FA Unterlüß	2012-11-06	57	18	3	adult	qualitative and quantitative normal spermatogenesis
39	K 4	Beverner Wald	2012-11-09	77	22	3	adult	qualitative and quantitative normal spermatogenesis
40	K 101/A 45	FA Wolfenbüttel	2012-11-29	32	11	2	pubertal	tubules with spermatocytes; few with round spermatids, single tubules with spermatozoa (almost adult)
41	K 102/A 159	FA Wolfenbüttel	2012-11-29	34	10	3	adult	qualitative normal spermatogenesis, spermatozoa in singular tubules
42	K 103/A 158	FA Wolfenbüttel	2012-11-29	40	11	3	adult	qualitative and quantitative normal spermatogenesis
43	K 107	FoVw Schulenburg	2012-11-10	47	10	3	adult	qualitative and quantitative normal spermatogenesis
44	K 108	FoVw Schulenburg	2012-11-10	73	14	3	adult	qualitative and quantitative normal spermatogenesis
45	K 109	FoVw Schulenburg	2012-11-10	29	9	1	prepubertal	Pre-spermatogonia, gonocytes
46	K123	FA Liebenburg	2012-12-29	34	10	3	adult	qualitative and quantitative normal spermatogenesis
47	K124	FA Liebenburg	2012-12-29	41	11	3	adult	qualitative and quantitative normal spermatogenesis
48	k125	FA Liebenburg	2012-12-29	29	10	3	adult	qualitative and quantitative normal spermatogenesis
49	K 121/A 132	FA Wolfenbüttel	2013-01-03	32	10	3	adult	qualitative and quantitative normal spermatogenesis
50	k 122/A 152	FA Wolfenbüttel	2013-01-03	37	10	3	adult	qualitative and quantitative normal spermatogenesis
51	K 126/A 214	FA Springe	2013-01-07	16	10	1	prepubertal	Pre-spermatogonia; gonocytes
52	K 127/A 215	FA Springe	2013-01-07	16	5	1	prepubertal	Pre-spermatogonia, gonocytes
53	K 128/A 211	FA Springe	2013-01-07	40	22	3	adult	qualitative and quantitative normal spermatogenesis
54	K 129/A 216	FA Springe	2013-01-07	NA	10	3	adult	qualitative and quantitative normal spermatogenesis
55	K 130/A 217	FA Wolfenbüttel	2013-01-08	34	10	3	adult	qualitative and quantitative normal spermatogenesis
56	K 131/A 218	FA Wolfenbüttel	2013-01-08	24	10	3	adult	qualitative and quantitative normal spermatogenesis
57	K 132/A 219	FA Wolfenbüttel	2013-01-08	35	10	2	pubertal	tubules with spermatocytes, round spermatids. Very few tubules with spermatozoa (almost adult)
58	k 133/A 165	FA Wolfenbüttel	2013-01-08	24	11	3	adult	qualitative and quantitative normal spermatogenesis
59	k140/A 273	FoVw Schulenburg	2013-01-10	32	10	3	adult	qualitative and quantitative normal spermatogenesis
60	k141/A 277	FoVw Schulenburg	2013-01-10	29	8.5	2	pubertal	tubules with spermatocytes (few)
61	k142/A 275	FoVw Schulenburg	2013-01-10	42	11	3	adult	qualitative and quantitative normal spermatogenesis
62	k143/A 278	FoVw Schulenburg	2013-01-10	27	8	1	prepubertal	Pre-spermatogenia, some gonocytes, few tubules with spermatocytes
63	k144/A 276	FoVw Schulenburg	2013-01-10	31	8	2	pubertal	tubules with spermatocytes
64	k145/A 274	FoVw Schulenburg	2013-01-10	37	11	3	adult	qualitative and quantitative normal spermatogenesis
65	k146	FoVw Schulenburg	2013-01-10	48	18	3	adult	qualitative and quantitative normal spermatogenesis
66	k147/A 292	FoVw Schulenburg	2013-01-11	24	10	1	prepubertal	Pre-spermatogonia; singular tubules with spermatocytes
67	k148/A 285	FoVw Schulenburg	2013-01-11	25	8	2	pubertal	tubules with spermatocytes
68	k149/A 284	FoVw Schulenburg	2013-01-11	36	10	3	adult	qualitative and quantitative normal spermatogenesis
69	k150/A 279	FoVw Schulenburg	2013-01-11	24	8.5	1	prepubertal	Pre-spermatogonia, many gonocytes
70	k151/A 281	FoVw Schulenburg	2013-01-11	31	11	1	prepubertal	Pre-spermatogenonia, single spermatocytes in few tubules (almost pubertal)
71	k152/A 287	FoVw Schulenburg	2013-01-11	43	10	3	adult	qualitative and quantitative normal spermatogenesis
72	k153/A 201	FoVw Schulenburg	2013-01-11	31	8.5	2	pubertal	tubules with spermatocytes, some tubules with round spermatids
73	k154/A 281	FoVw Schulenburg	2013-01-11	31	11	2	pubertal	tubules with spermatocytes, some with round spermatids, single elongated spermatids (almost adult)
74	k155/A 295	FoVw Schulenburg	2013-01-11	35	8.5	3	adult	qualitative (and quantitative) normal spermatogenesis
